# Supplementary material for: Titanate hollow nanospheres as electron-transport layer in mesoscopic perovskite solar cell with enhanced performance
Source: Royal Society of Chemistry journal article supplement (doi:10.1039/c8tc06218h), 2019-01-01
Supplement: c8tc06218h1.pdf [file c8tc06218h1.pdf]

## Electronic Supplementary Information

### Titanate Hollow Nanospheres as Electron-transport Layer in Mesoscopic Perovskite Solar Cell with Enhanced Performance

Hui Wang <sup>a</sup>, Rui Jiang <sup>a</sup>, Meili Sun <sup>a</sup>, Xiong Yin <sup>\*a</sup>, Yanjun Guo <sup>b</sup>, Meng He <sup>\*b,c</sup> and  
Leyu Wang <sup>\*a</sup>

<sup>a</sup> State Key Laboratory of Chemical Resource Engineering, Innovation Centre for Soft Matter Science and Engineering, Beijing University of Chemical Technology, Beijing 100029, P. R. China.

<sup>b</sup> CAS Key Laboratory of Nanosystem and Hierarchical Fabrication, CAS Center for Excellence in Nanoscience, National Center for Nanoscience and Technology, Beijing 100190, P. R. China.

<sup>c</sup> School of Physical Sciences, University of Chinese Academy of Sciences, Beijing 100049, P. R. China.

\*E-mails: [yinxiong@mail.buct.edu.cn](mailto:yinxiong@mail.buct.edu.cn) ; [lywang@mail.buct.edu.cn](mailto:lywang@mail.buct.edu.cn); [mhe@nanoctr.cn](mailto:mhe@nanoctr.cn)

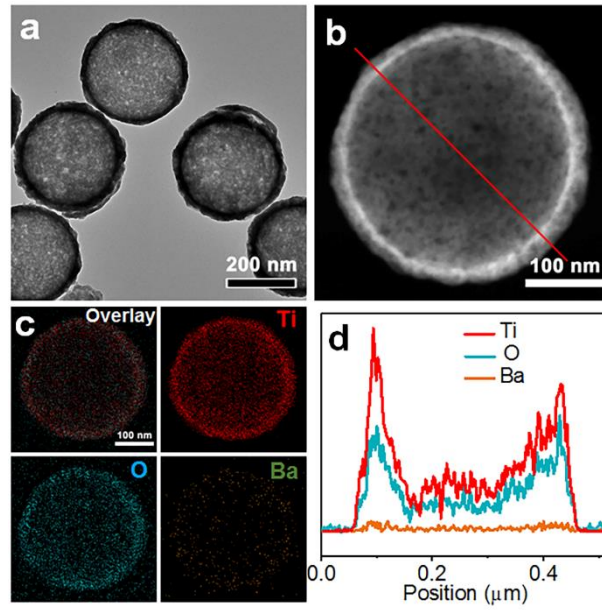

**Figure S1.** TEM image and mapping images for the Ti-Ba-O nanoshells.

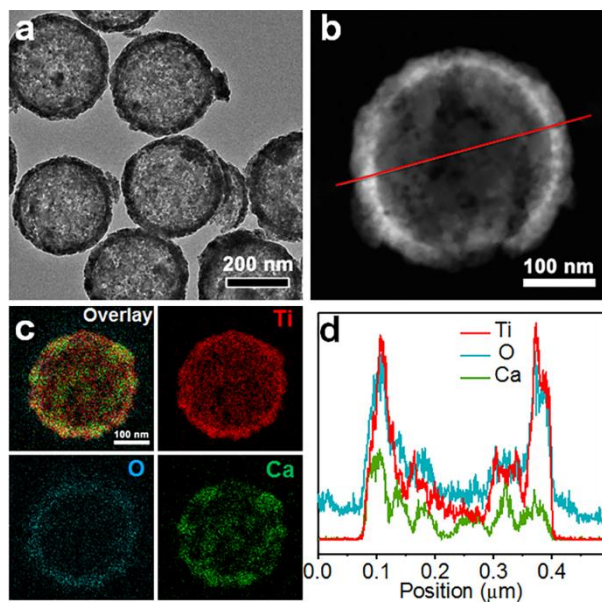

**Figure S2.** TEM image and mapping images for the Ti-Ca-O nanoshells.

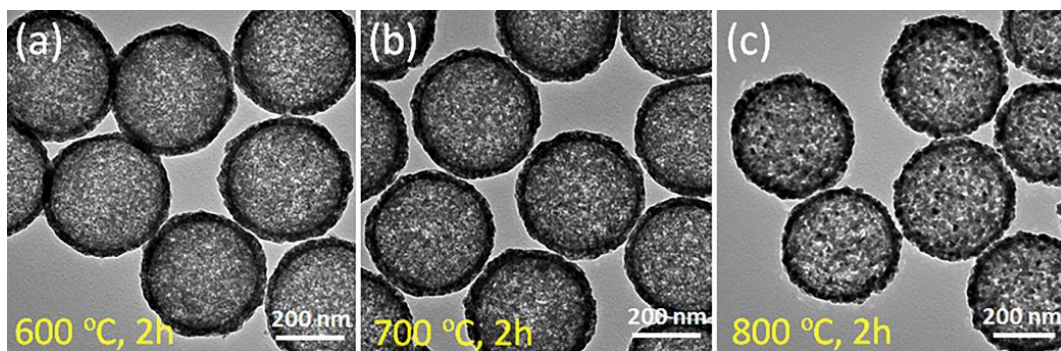

**Figure S3.** TEM images of Ti-Zn-O nanoshells sintered at different temperatures for 2 hours.

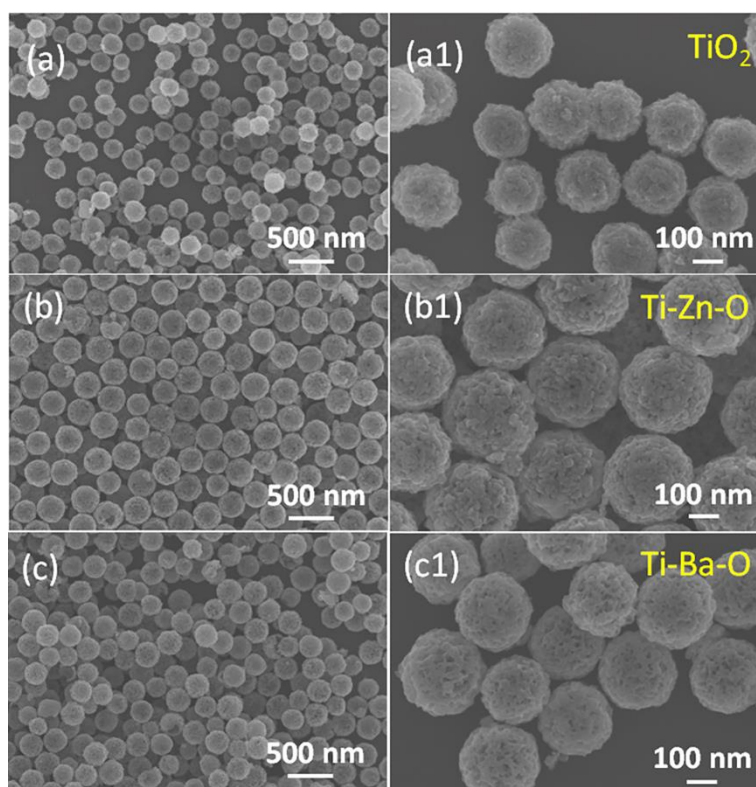

**Figure S4.** SEM images with different magnifications of the different nanoshells prepared at 800 °C for 2 hours: (a) TiO<sub>2</sub>, (b) Ti-Zn-O and (c) Ti-Ba-O.

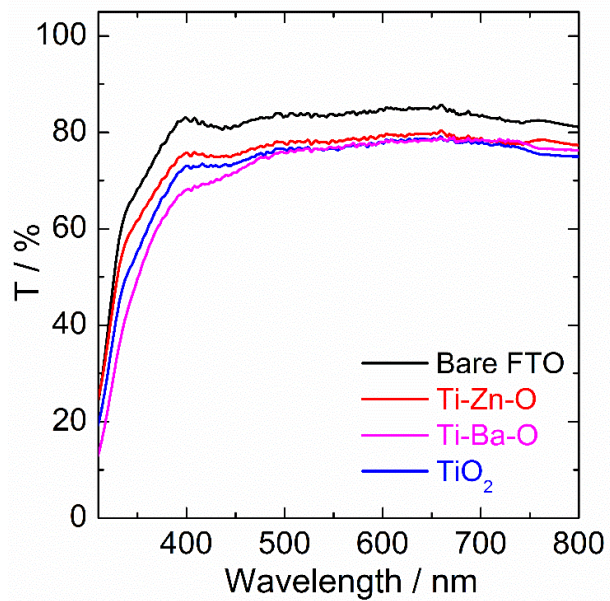

**Figure S5.** UV-Vis transmittance spectra of the bare FTO,  $\text{TiO}_2$ , Ti-Zn-O and Ti-Ba-O shells covered FTO substrates.

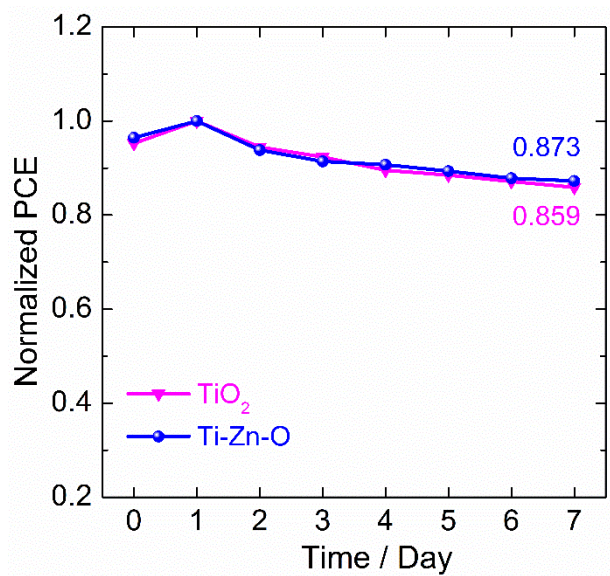

**Figure S6.** The variation of normalized PCE for perovskite solar cells with the time. The devices were unpackaged, and stored in a desiccator.

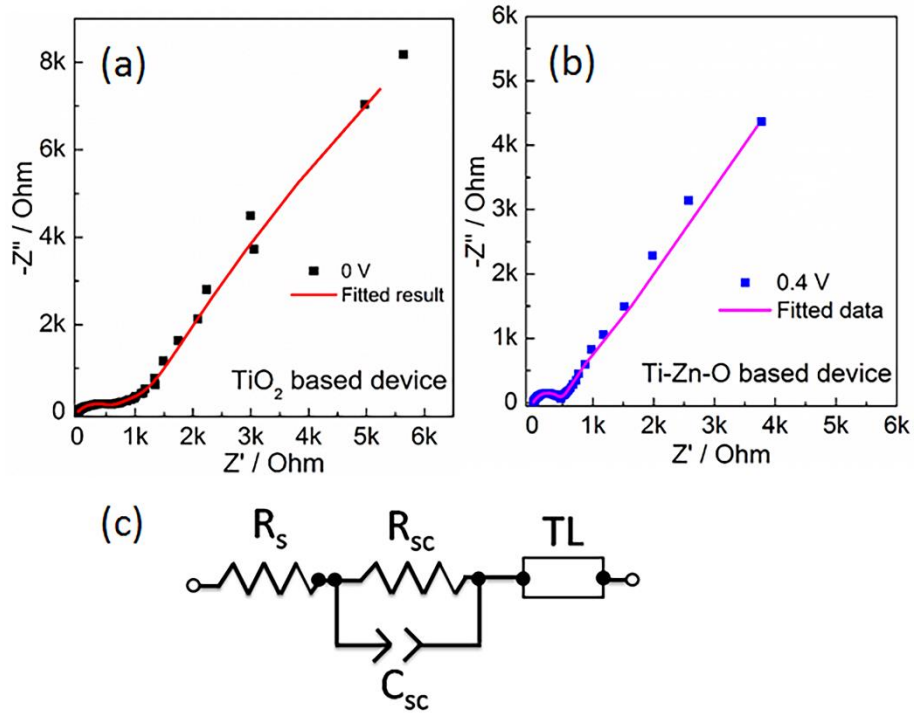

**Figure S7.** Nyquist plots of mesoscopic perovskite solar cells with (a)  $\text{TiO}_2$  and (b) Ti-Zn-O hollow nanospheres ETLs, measured under light illumination with applied forward bias; symbols represent the experimental data and solid lines are the fitted curves; (c) The equivalent circuit used for fitting in the study.
